# Supplementary material
Source: Research Square preprint supplement (doi:10.21203/rs.3.rs-9141317/v1)
Supplement: Supplementary file 1 [file b56e7314f406925a4cb40a39.docx]

|  | **DX (N=33)** | **SN (N=16)** | **p value** |
| --- | --- | --- | --- |
| **AP Resting Pre (mm)**, Median (Q1, Q3) | 7.70 (4.00, 9.70) | 7.95 (3.82, 12.03) | 0.482 |
| **LL Resting Pre (mm)**, Median (Q1, Q3) | 10.40 (7.00, 13.50) | 10.40 (7.80, 14.35) | 0.898 |
| **Aspect Resting Pre**, Median (Q1, Q3) | 0.71 (0.64, 0.87) | 0.82 (0.57, 0.91) | 0.282 |
| **CSA Resting Pre (cm2)**, Median (Q1, Q3) | 0.69 (0.18, 0.95) | 0.47 (0.25, 1.47) | 0.678 |
| **AP Inspirium Pre (mm)**, Median (Q1, Q3) | 4.00 (1.70, 6.30) | 3.75 (1.65, 6.58) | 0.932 |
| **LL Inspirium Pre (mm)**, Median (Q1, Q3) | 7.40 (4.10, 10.00) | 7.00 (2.47, 9.75) | 0.756 |
| **Aspect Inspirium Pre**, Median (Q1, Q3) | 0.58 (0.18, 0.75) | 0.67 (0.20, 0.76) | 0.847 |
| **CSA Inspirium Pre (cm2)**, Median (Q1, Q3) | 0.23 (0.07, 0.61) | 0.17 (0.05, 0.45) | 0.872 |
| **AP Valsalva Pre (mm)**, Median (Q1, Q3) | 12.80 (9.60, 14.30) | 12.75 (11.73, 14.27) | 0.806 |
| **LL Valsalva Pre (mm)**, Median (Q1, Q3) | 17.30 (13.40, 19.70) | 14.50 (13.23, 19.30) | 0.509 |
| **Aspect Valsalva Pre**, Median (Q1, Q3) | 0.79 (0.67, 0.90) | 0.82 (0.75, 0.92) | 0.336 |
| **CSA Valsalva Pre (cm2)**, Median (Q1, Q3) | 1.80 (1.07, 2.23) | 1.50 (1.21, 2.23) | 0.790 |
| **Cava Resting Pre (mm)**, Median (Q1, Q3) | 17.00 (11.95, 22.15) | 14.70 (12.55, 18.90) | 0.665 |
| **Cava Inspirium Pre (mm)**, Median (Q1, Q3) | 12.00 (7.20, 15.85) | 12.30 (6.55, 16.15) | 0.979 |
| **CCI Pre**, Median (Q1, Q3) | 31.40 (19.91, 39.54) | 26.47 (15.60, 41.96) | 0.294 |
| **JCI Pre**, Median (Q1, Q3) | 49.33 (30.00, 80.87) | 52.59 (33.09, 96.61) | 0.692 |
| **JVD Ratio Pre**, Median (Q1, Q3) | 1.57 (1.33, 2.27) | 1.40 (1.26, 2.90) | 0.488 |
| **CSA Ratio Pre**, Median (Q1, Q3) | 2.28 (1.58, 3.59) | 2.25 (1.59, 5.60) | 0.685 |
| **AP Resting Post (mm)**, Median (Q1, Q3) | 4.50 (3.20, 6.50) | 3.05 (2.25, 5.58) | 0.342 |
| **LL Resting Post (mm)**, Median (Q1, Q3) | 8.70 (6.20, 11.70) | 7.55 (4.77, 11.47) | 0.609 |
| **Aspect Resting Post**, Median (Q1, Q3) | 0.55 (0.36, 0.63) | 0.42 (0.32, 0.62) | 0.482 |
| **CSA Resting Post (cm2)**, Median (Q1, Q3) | 0.26 (0.13, 0.64) | 0.19 (0.11, 0.48) | 0.502 |
| **AP Inspirium Post (mm)**, Median (Q1, Q3) | 1.00 (0.00, 3.60) | 0.05 (0.00, 2.90) | 0.794 |
| **LL Inspirium Post (mm)**, Median (Q1, Q3) | 3.50 (0.00, 7.50) | 0.00 (0.00, 4.50) | 0.517 |
| **Aspect Inspirium Post**, Median (Q1, Q3) | 0.15 (0.00, 0.53) | 0.00 (0.00, 0.48) | 0.501 |
| **CSA Inspirium Post (cm2)**, Median (Q1, Q3) | 0.05 (0.00, 0.24) | 0.00 (0.00, 0.10) | 0.495 |
| **AP Valsalva Post (mm)**, Median (Q1, Q3) | 12.70 (9.30, 14.40) | 12.10 (9.42, 13.48) | 0.515 |
| **LL Valsalva Post (mm)**, Median (Q1, Q3) | 17.20 (12.20, 20.60) | 15.70 (12.38, 17.83) | 0.268 |
| **Aspect Valsalva Post**, Median (Q1, Q3) | 0.75 (0.65, 0.86) | 0.77 (0.70, 0.83) | 0.650 |
| **CSA Valsalva Post (cm2)**, Median (Q1, Q3) | 1.76 (0.92, 2.38) | 1.48 (1.02, 1.79) | 0.306 |
| **Cava Resting Post (mm)**, Median (Q1, Q3) | 12.10 (8.55, 15.35) | 9.70 (7.75, 13.60) | 0.401 |
| **Cava Inspirium Post (mm)**, Median (Q1, Q3) | 6.60 (3.00, 9.40) | 5.50 (3.15, 9.45) | 0.833 |
| **CCI Post**, Median (Q1, Q3) | 43.80 (31.97, 54.77) | 46.39 (28.73, 62.06) | 0.722 |
| **JCI Post**, Median (Q1, Q3) | 78.10 (31.34, 100.00) | 100.00 (57.70, 100.00) | 0.384 |
| **JVD Ratio Post**, Median (Q1, Q3) | 2.32 (1.69, 3.76) | 3.22 (1.52, 4.69) | 0.576 |
| **CSA Ratio Post**, Median (Q1, Q3) | 3.91 (2.99, 12.57) | 8.50 (2.68, 12.12) | 0.605 |

Stratification for laterality of the studied IJV

|  | **NO AVF (N=15)** | **AVF (N=34)** | **p value** |
| --- | --- | --- | --- |
| **AP Resting Pre (mm)**, Median (Q1, Q3) | 6.90 (3.40, 11.55) | 8.15 (4.20, 10.15) | 0.948 |
| **LL Resting Pre (mm)**, Median (Q1, Q3) | 9.80 (7.35, 13.55) | 10.65 (7.80, 13.57) | 0.680 |
| **Aspect Resting Pre**, Median (Q1, Q3) | 0.79 (0.58, 0.86) | 0.71 (0.62, 0.88) | 0.745 |
| **CSA Resting Pre (cm2)**, Median (Q1, Q3) | 0.61 (0.19, 1.29) | 0.64 (0.27, 1.09) | 0.854 |
| **AP Inspirium Pre (mm)**, Median (Q1, Q3) | 4.40 (2.50, 8.20) | 3.70 (0.00, 5.50) | 0.190 |
| **LL Inspirium Pre (mm)**, Median (Q1, Q3) | 7.70 (5.95, 10.80) | 6.30 (0.00, 9.38) | 0.214 |
| **Aspect Inspirium Pre**, Median (Q1, Q3) | 0.66 (0.41, 0.81) | 0.55 (0.00, 0.74) | 0.198 |
| **CSA Inspirium Pre (cm2)**, Median (Q1, Q3) | 0.27 (0.12, 0.72) | 0.18 (0.00, 0.39) | 0.247 |
| **AP Valsalva Pre (mm)**, Median (Q1, Q3) | 13.10 (10.70, 13.85) | 12.80 (10.77, 14.97) | 0.664 |
| **LL Valsalva Pre (mm)**, Median (Q1, Q3) | 14.60 (12.60, 19.35) | 17.35 (13.43, 19.93) | 0.241 |
| **Aspect Valsalva Pre**, Median (Q1, Q3) | 0.82 (0.75, 0.94) | 0.79 (0.67, 0.90) | 0.184 |
| **CSA Valsalva Pre (cm2)**, Median (Q1, Q3) | 1.54 (1.06, 2.08) | 1.86 (1.15, 2.22) | 0.410 |
| **Cava Resting Pre (mm)**, Median (Q1, Q3) | 15.20 (13.10, 22.45) | 16.50 (11.88, 20.42) | 0.835 |
| **Cava Inspirium Pre (mm)**, Median (Q1, Q3) | 12.55 (6.48, 15.75) | 11.65 (7.10, 16.12) | 1.000 |
| **CCI Pre**, Median (Q1, Q3) | 27.37 (17.94, 41.07) | 30.39 (18.98, 39.91) | 0.791 |
| **JCI Pre**, Median (Q1, Q3) | 38.89 (28.69, 54.44) | 59.16 (32.90, 100.00) | 0.138 |
| **JVD Ratio Pre**, Median (Q1, Q3) | 1.44 (1.24, 2.60) | 1.55 (1.37, 2.69) | 0.398 |
| **CSA Ratio Pre**, Median (Q1, Q3) | 1.70 (1.55, 3.48) | 2.42 (1.58, 4.84) | 0.862 |
| **AP Resting Post (mm)**, Median (Q1, Q3) | 3.50 (2.20, 6.60) | 3.85 (2.67, 6.47) | 0.778 |
| **LL Resting Post (mm)**, Median (Q1, Q3) | 7.30 (3.55, 11.85) | 8.80 (6.23, 11.67) | 0.374 |
| **Aspect Resting Post**, Median (Q1, Q3) | 0.59 (0.33, 0.79) | 0.53 (0.35, 0.61) | 0.474 |
| **CSA Resting Post (cm2)**, Median (Q1, Q3) | 0.19 (0.09, 0.78) | 0.22 (0.14, 0.62) | 0.672 |
| **AP Inspirium Post (mm)**, Median (Q1, Q3) | 0.10 (0.00, 3.55) | 0.05 (0.00, 3.25) | 0.773 |
| **LL Inspirium Post (mm)**, Median (Q1, Q3) | 0.00 (0.00, 6.65) | 0.00 (0.00, 7.17) | 0.751 |
| **Aspect Inspirium Post**, Median (Q1, Q3) | 0.00 (0.00, 0.48) | 0.00 (0.00, 0.53) | 0.990 |
| **CSA Inspirium Post (cm2)**, Median (Q1, Q3) | 0.00 (0.00, 0.20) | 0.00 (0.00, 0.18) | 0.869 |
| **AP Valsalva Post (mm)**, Median (Q1, Q3) | 12.50 (7.90, 13.55) | 12.65 (9.50, 14.33) | 0.494 |
| **LL Valsalva Post (mm)**, Median (Q1, Q3) | 16.90 (11.95, 17.85) | 16.60 (12.27, 20.60) | 0.250 |
| **Aspect Valsalva Post**, Median (Q1, Q3) | 0.78 (0.72, 0.82) | 0.71 (0.63, 0.85) | 0.317 |
| **CSA Valsalva Post (cm2)**, Median (Q1, Q3) | 1.59 (0.96, 1.85) | 1.70 (0.92, 2.36) | 0.293 |
| **Cava Resting Post (mm)**, Median (Q1, Q3) | 10.55 (7.55, 14.15) | 11.45 (9.05, 14.33) | 0.759 |
| **Cava Inspirium Post (mm)**, Median (Q1, Q3) | 5.50 (3.53, 9.55) | 6.15 (3.00, 9.40) | 0.823 |
| **CCI Post**, Median (Q1, Q3) | 47.84 (30.27, 58.80) | 43.55 (32.16, 58.82) | 0.845 |
| **JCI Post**, Median (Q1, Q3) | 94.93 (57.71, 100.00) | 100.00 (31.71, 100.00) | 0.960 |
| **JVD Ratio Post**, Median (Q1, Q3) | 2.36 (1.50, 4.73) | 2.63 (1.89, 4.09) | 0.691 |
| **CSA Ratio Post**, Median (Q1, Q3) | 3.91 (1.89, 15.06) | 4.46 (3.09, 12.38) | 0.599 |

Stratification for Arterovenous Fistula (AVF)

|  | **HFpEF (N=14)** | **HFrEF (N=7)** | **NO (N=28)** | **p value** |
| --- | --- | --- | --- | --- |
| **AP Resting Pre (mm)**, Median (Q1, Q3) | 8.35 (4.23, 10.82) | 3.90 (3.45, 6.60) | 7.50 (4.45, 10.45) | 0.948 |
| **LL Resting Pre (mm)**, Median (Q1, Q3) | 11.60 (5.97, 14.57) | 7.00 (5.90, 8.95) | 10.65 (7.80, 13.72) | 0.680 |
| **Aspect Resting Pre**, Median (Q1, Q3) | 0.82 (0.63, 0.87) | 0.67 (0.55, 0.83) | 0.74 (0.62, 0.88) | 0.745 |
| **CSA Resting Pre (cm2)**, Median (Q1, Q3) | 0.79 (0.27, 1.14) | 0.20 (0.18, 0.30) | 0.65 (0.28, 1.17) | 0.854 |
| **AP Inspirium Pre (mm)**, Median (Q1, Q3) | 5.45 (0.75, 8.78) | 2.70 (2.15, 4.25) | 4.05 (1.93, 5.10) | 0.190 |
| **LL Inspirium Pre (mm)**, Median (Q1, Q3) | 9.90 (1.07, 12.40) | 6.80 (5.20, 7.50) | 6.75 (3.10, 9.33) | 0.214 |
| **Aspect Inspirium Pre**, Median (Q1, Q3) | 0.62 (0.04, 0.77) | 0.50 (0.30, 0.64) | 0.60 (0.24, 0.76) | 0.198 |
| **CSA Inspirium Pre (cm2)**, Median (Q1, Q3) | 0.50 (0.03, 0.80) | 0.12 (0.10, 0.22) | 0.18 (0.07, 0.36) | 0.247 |
| **AP Valsalva Pre (mm)**, Median (Q1, Q3) | 13.85 (11.77, 15.50) | 13.00 (9.50, 13.25) | 12.75 (9.52, 14.15) | 0.664 |
| **LL Valsalva Pre (mm)**, Median (Q1, Q3) | 15.85 (14.62, 20.00) | 14.40 (13.45, 18.95) | 16.95 (12.65, 19.75) | 0.241 |
| **Aspect Valsalva Pre**, Median (Q1, Q3) | 0.82 (0.79, 0.95) | 0.78 (0.66, 0.91) | 0.79 (0.71, 0.90) | 0.184 |
| **CSA Valsalva Pre (cm2)**, Median (Q1, Q3) | 1.86 (1.39, 2.26) | 1.54 (0.98, 2.09) | 1.70 (0.98, 2.19) | 0.410 |
| **Cava Resting Pre (mm)**, Median (Q1, Q3) | 16.75 (13.52, 21.05) | 14.55 (12.22, 15.68) | 15.85 (11.75, 22.20) | 0.835 |
| **Cava Inspirium Pre (mm)**, Median (Q1, Q3) | 13.15 (8.40, 15.98) | 7.50 (1.60, 10.63) | 12.15 (7.30, 16.52) | 1.000 |
| **CCI Pre**, Median (Q1, Q3) | 24.28 (18.19, 45.42) | 42.31 (32.94, 86.09) | 27.46 (18.05, 35.48) | 0.791 |
| **JCI Pre**, Median (Q1, Q3) | 36.38 (26.26, 87.50) | 44.44 (36.94, 69.01) | 62.81 (33.33, 88.34) | 0.138 |
| **JVD Ratio Pre**, Median (Q1, Q3) | 1.63 (1.37, 2.69) | 1.60 (1.40, 3.84) | 1.48 (1.26, 2.04) | 0.398 |
| **CSA Ratio Pre**, Median (Q1, Q3) | 2.48 (1.67, 5.21) | 4.16 (2.17, 10.16) | 1.74 (1.57, 3.50) | 0.260 |
| **AP Resting Post (mm)**, Median (Q1, Q3) | 5.00 (2.35, 7.75) | 3.50 (1.15, 3.75) | 3.80 (2.80, 6.43) | 0.778 |
| **LL Resting Post (mm)**, Median (Q1, Q3) | 8.75 (3.95, 13.60) | 5.30 (1.95, 9.00) | 8.75 (6.52, 11.62) | 0.374 |
| **Aspect Resting Post**, Median (Q1, Q3) | 0.60 (0.44, 0.63) | 0.34 (0.16, 0.52) | 0.50 (0.36, 0.61) | 0.474 |
| **CSA Resting Post (cm2)**, Median (Q1, Q3) | 0.43 (0.06, 0.77) | 0.13 (0.06, 0.22) | 0.22 (0.14, 0.65) | 0.672 |
| **AP Inspirium Post (mm)**, Median (Q1, Q3) | 2.45 (0.00, 6.08) | 0.00 (0.00, 0.55) | 0.00 (0.00, 3.15) | 0.773 |
| **LL Inspirium Post (mm)**, Median (Q1, Q3) | 7.10 (0.00, 11.23) | 0.00 (0.00, 1.80) | 0.00 (0.00, 4.72) | 0.751 |
| **Aspect Inspirium Post**, Median (Q1, Q3) | 0.42 (0.00, 0.56) | 0.00 (0.00, 0.08) | 0.00 (0.00, 0.52) | 0.990 |
| **CSA Inspirium Post (cm2)**, Median (Q1, Q3) | 0.17 (0.00, 0.56) | 0.00 (0.00, 0.02) | 0.00 (0.00, 0.15) | 0.869 |
| **AP Valsalva Post (mm)**, Median (Q1, Q3) | 11.85 (7.92, 13.52) | 12.80 (8.05, 15.00) | 12.65 (9.50, 14.17) | 0.494 |
| **LL Valsalva Post (mm)**, Median (Q1, Q3) | 16.80 (11.75, 19.62) | 15.80 (11.80, 19.85) | 16.85 (13.47, 19.85) | 0.250 |
| **Aspect Valsalva Post**, Median (Q1, Q3) | 0.71 (0.68, 0.81) | 0.81 (0.72, 0.86) | 0.76 (0.67, 0.82) | 0.317 |
| **CSA Valsalva Post (cm2)**, Median (Q1, Q3) | 1.44 (0.90, 2.23) | 1.59 (0.70, 2.43) | 1.62 (1.13, 2.24) | 0.293 |
| **Cava Resting Post (mm)**, Median (Q1, Q3) | 11.25 (7.77, 15.53) | 9.10 (6.60, 12.20) | 12.30 (8.92, 15.25) | 0.759 |
| **Cava Inspirium Post (mm)**, Median (Q1, Q3) | 8.10 (3.22, 10.05) | 1.50 (0.00, 3.00) | 6.70 (3.58, 9.70) | 0.823 |
| **CCI Post**, Median (Q1, Q3) | 32.29 (24.32, 44.59) | 88.64 (67.14, 100.00) | 44.58 (31.72, 49.97) | 0.845 |
| **JCI Post**, Median (Q1, Q3) | 31.71 (26.32, 100.00) | 100.00 (72.37, 100.00) | 100.00 (58.22, 100.00) | 0.960 |
| **JVD Ratio Post**, Median (Q1, Q3) | 2.22 (1.51, 4.27) | 3.22 (2.26, 16.37) | 2.51 (1.64, 3.79) | 0.691 |
| **CSA Ratio Post**, Median (Q1, Q3) | 4.46 (2.32, 11.62) | 6.45 (3.13, 90.25) | 3.98 (2.85, 9.47) | 0.599 |

Stratification for HF

|  | **NO AF (N=38)** | **AF (N=11)** | **p value** |
| --- | --- | --- | --- |
| **AP Resting Pre (mm)**, Median (Q1, Q3) | 7.30 (3.92, 10.15) | 9.00 (4.45, 12.55) | 0.362 |
| **LL Resting Pre (mm)**, Median (Q1, Q3) | 10.05 (7.05, 13.10) | 12.50 (8.60, 13.80) | 0.415 |
| **Aspect Resting Pre**, Median (Q1, Q3) | 0.71 (0.64, 0.87) | 0.85 (0.47, 0.89) | 0.557 |
| **CSA Resting Pre (cm2)**, Median (Q1, Q3) | 0.65 (0.18, 0.94) | 0.59 (0.32, 1.41) | 0.402 |
| **AP Inspirium Pre (mm)**, Median (Q1, Q3) | 3.40 (1.38, 5.47) | 5.50 (2.95, 9.45) | 0.112 |
| **LL Inspirium Pre (mm)**, Median (Q1, Q3) | 6.25 (2.70, 9.25) | 9.30 (7.05, 11.80) | 0.117 |
| **Aspect Inspirium Pre**, Median (Q1, Q3) | 0.59 (0.17, 0.74) | 0.66 (0.30, 0.76) | 0.772 |
| **CSA Inspirium Pre (cm2)**, Median (Q1, Q3) | 0.17 (0.07, 0.39) | 0.35 (0.18, 0.86) | 0.129 |
| **AP Valsalva Pre (mm)**, Median (Q1, Q3) | 12.75 (9.60, 14.97) | 13.60 (12.20, 14.20) | 0.436 |
| **LL Valsalva Pre (mm)**, Median (Q1, Q3) | 15.85 (12.87, 19.93) | 18.20 (15.15, 19.35) | 0.525 |
| **Aspect Valsalva Pre**, Median (Q1, Q3) | 0.81 (0.69, 0.93) | 0.79 (0.74, 0.84) | 0.867 |
| **CSA Valsalva Pre (cm2)**, Median (Q1, Q3) | 1.67 (1.01, 2.22) | 2.05 (1.54, 2.21) | 0.326 |
| **Cava Resting Pre (mm)**, Median (Q1, Q3) | 17.00 (12.10, 22.10) | 14.70 (11.50, 15.90) | 0.520 |
| **Cava Inspirium Pre (mm)**, Median (Q1, Q3) | 12.30 (7.40, 16.20) | 10.80 (6.70, 13.30) | 0.560 |
| **CCI Pre**, Median (Q1, Q3) | 29.38 (18.85, 40.28) | 28.26 (18.47, 40.18) | 0.951 |
| **JCI Pre**, Median (Q1, Q3) | 38.14 (20.68, 76.71) | 29.66 (13.41, 56.87) | 0.273 |
| **JVD Ratio Pre**, Median (Q1, Q3) | 1.56 (1.38, 2.49) | 1.30 (1.19, 3.20) | 0.236 |
| **CSA Ratio Pre**, Median (Q1, Q3) | 2.31 (1.60, 4.55) | 1.86 (1.41, 5.32) | 0.582 |
| **AP Resting Post (mm)**, Median (Q1, Q3) | 3.70 (2.50, 6.47) | 3.60 (2.30, 6.70) | 0.838 |
| **LL Resting Post (mm)**, Median (Q1, Q3) | 7.70 (5.52, 11.67) | 9.90 (6.60, 12.40) | 0.606 |
| **Aspect Resting Post**, Median (Q1, Q3) | 0.55 (0.37, 0.63) | 0.43 (0.33, 0.60) | 0.573 |
| **CSA Resting Post (cm2)**, Median (Q1, Q3) | 0.21 (0.13, 0.62) | 0.26 (0.16, 0.63) | 0.675 |
| **AP Inspirium Post (mm)**, Median (Q1, Q3) | 0.00 (0.00, 3.05) | 1.00 (0.00, 4.55) | 0.451 |
| **LL Inspirium Post (mm)**, Median (Q1, Q3) | 0.00 (0.00, 5.78) | 5.40 (0.00, 9.40) | 0.299 |
| **Aspect Inspirium Post**, Median (Q1, Q3) | 0.00 (0.00, 0.53) | 0.15 (0.00, 0.51) | 0.741 |
| **CSA Inspirium Post (cm2)**, Median (Q1, Q3) | 0.00 (0.00, 0.15) | 0.05 (0.00, 0.40) | 0.336 |
| **AP Valsalva Post (mm)**, Median (Q1, Q3) | 12.75 (9.50, 14.10) | 11.70 (9.10, 13.90) | 0.701 |
| **LL Valsalva Post (mm)**, Median (Q1, Q3) | 16.60 (12.57, 20.50) | 17.50 (11.10, 17.95) | 0.502 |
| **Aspect Valsalva Post**, Median (Q1, Q3) | 0.75 (0.66, 0.85) | 0.77 (0.69, 0.81) | 1.000 |
| **CSA Valsalva Post (cm2)**, Median (Q1, Q3) | 1.61 (0.97, 2.31) | 1.60 (0.82, 2.01) | 0.649 |
| **Cava Resting Post (mm)**, Median (Q1, Q3) | 11.80 (7.10, 14.40) | 10.60 (9.20, 12.10) | 0.842 |
| **Cava Inspirium Post (mm)**, Median (Q1, Q3) | 5.70 (3.00, 9.70) | 5.80 (3.50, 7.00) | 0.951 |
| **CCI Post**, Median (Q1, Q3) | 43.30 (30.88, 60.24) | 46.39 (34.58, 57.14) | 0.570 |
| **JCI Post**, Median (Q1, Q3) | 100.00 (41.12, 100.00) | 61.84 (27.50, 100.00) | 0.524 |
| **JVD Ratio Post**, Median (Q1, Q3) | 2.51 (1.87, 3.75) | 2.67 (1.49, 5.87) | 0.774 |
| **CSA Ratio Post**, Median (Q1, Q3) | 4.46 (2.99, 11.62) | 3.41 (1.72, 16.75) | 0.598 |

Stratification for Atrial Fibrillation (AF)

|  | **F (N=15)** | **M (N=34)** | **p value** |
| --- | --- | --- | --- |
| **AP Resting Pre (mm)**, Median (Q1, Q3) | 9.70 (4.95, 10.70) | 5.95 (3.92, 10.10) | 0.323 |
| **LL Resting Pre (mm)**, Median (Q1, Q3) | 11.00 (9.05, 13.30) | 9.65 (6.65, 13.95) | 0.356 |
| **Aspect Resting Pre**, Median (Q1, Q3) | 0.79 (0.56, 0.88) | 0.71 (0.64, 0.87) | 0.753 |
| **CSA Resting Pre (cm2)**, Median (Q1, Q3) | 0.86 (0.32, 1.14) | 0.58 (0.18, 0.89) | 0.241 |
| **AP Inspirium Pre (mm)**, Median (Q1, Q3) | 5.40 (2.45, 8.85) | 3.60 (1.25, 5.30) | 0.214 |
| **LL Inspirium Pre (mm)**, Median (Q1, Q3) | 8.20 (5.70, 11.45) | 6.25 (2.70, 9.30) | 0.234 |
| **Aspect Inspirium Pre**, Median (Q1, Q3) | 0.66 (0.31, 0.79) | 0.59 (0.17, 0.71) | 0.472 |
| **CSA Inspirium Pre (cm2)**, Median (Q1, Q3) | 0.31 (0.12, 0.80) | 0.18 (0.07, 0.37) | 0.190 |
| **AP Valsalva Pre (mm)**, Median (Q1, Q3) | 13.40 (12.10, 14.20) | 12.75 (9.38, 14.68) | 0.334 |
| **LL Valsalva Pre (mm)**, Median (Q1, Q3) | 15.90 (14.50, 18.65) | 16.35 (11.88, 19.98) | 0.786 |
| **Aspect Valsalva Pre**, Median (Q1, Q3) | 0.82 (0.74, 0.92) | 0.79 (0.70, 0.90) | 0.396 |
| **CSA Valsalva Pre (cm2)**, Median (Q1, Q3) | 1.80 (1.33, 2.13) | 1.70 (0.98, 2.42) | 0.641 |
| **Cava Resting Pre (mm)**, Median (Q1, Q3) | 13.60 (12.10, 15.70) | 17.60 (11.80, 22.30) | 0.089 |
| **Cava Inspirium Pre (mm)**, Median (Q1, Q3) | 9.90 (6.40, 12.80) | 14.00 (7.40, 16.50) | 0.068 |
| **CCI Pre**, Median (Q1, Q3) | 26.67 (24.32, 43.75) | 29.38 (17.65, 38.81) | 0.406 |
| **JCI Pre**, Median (Q1, Q3) | 40.00 (25.58, 80.74) | 53.57 (32.90, 92.60) | 0.472 |
| **JVD Ratio Pre**, Median (Q1, Q3) | 1.48 (1.28, 2.54) | 1.58 (1.34, 2.69) | 0.610 |
| **CSA Ratio Pre**, Median (Q1, Q3) | 2.35 (1.58, 4.17) | 2.15 (1.57, 4.84) | 0.246 |
| **AP Resting Post (mm)**, Median (Q1, Q3) | 6.40 (2.30, 7.60) | 3.50 (2.50, 5.45) | 0.224 |
| **LL Resting Post (mm)**, Median (Q1, Q3) | 10.60 (8.35, 13.35) | 7.35 (5.45, 10.35) | 0.088 |
| **Aspect Resting Post**, Median (Q1, Q3) | 0.55 (0.30, 0.62) | 0.53 (0.36, 0.63) | 0.664 |
| **CSA Resting Post (cm2)**, Median (Q1, Q3) | 0.00 (0.00, 5.65) | 0.55 (0.00, 3.05) | 0.129 |
| **AP Inspirium Post (mm)**, Median (Q1, Q3) | 0.00 (0.00, 10.50) | 1.75 (0.00, 6.00) | 0.799 |
| **LL Inspirium Post (mm)**, Median (Q1, Q3) | 0.00 (0.00, 0.52) | 0.14 (0.00, 0.53) | 0.805 |
| **Aspect Inspirium Post**, Median (Q1, Q3) | 0.00 (0.00, 0.52) | 0.02 (0.00, 0.15) | 0.573 |
| **CSA Inspirium Post (cm2)**, Median (Q1, Q3) | 0.00 (0.00, 0.52) | 0.02 (0.00, 0.15) | 0.733 |
| **AP Valsalva Post (mm)**, Median (Q1, Q3) | 11.70 (9.35, 13.90) | 12.75 (9.35, 14.10) | 0.761 |
| **LL Valsalva Post (mm)**, Median (Q1, Q3) | 17.50 (14.00, 19.85) | 16.05 (12.27, 20.40) | 0.704 |
| **Aspect Valsalva Post**, Median (Q1, Q3) | 0.70 (0.67, 0.78) | 0.78 (0.68, 0.86) | 0.192 |
| **CSA Valsalva Post (cm2)**, Median (Q1, Q3) | 1.60 (1.01, 2.27) | 1.57 (0.90, 2.28) | 0.770 |
| **Cava Resting Post (mm)**, Median (Q1, Q3) | 9.20 (7.70, 10.70) | 13.20 (9.00, 16.60) | 0.019 |
| **Cava Inspirium Post (mm)**, Median (Q1, Q3) | 3.30 (0.00, 5.80) | 7.30 (3.60, 11.10) | 0.005 |
| **CCI Post**, Median (Q1, Q3) | 66.98 (46.39, 100.00) | 38.78 (30.88, 48.28) | 0.008 |
| **JCI Post**, Median (Q1, Q3) | 100.00 (37.94, 100.00) | 89.86 (57.89, 100.00) | 0.920 |
| **JVD Ratio Post**, Median (Q1, Q3) | 2.08 (1.55, 4.36) | 2.87 (1.87, 4.16) | 0.384 |
| **CSA Ratio Post**, Median (Q1, Q3) | 3.46 (1.87, 10.19) | 5.13 (3.02, 12.55) | 0.317 |

Stratification for sex

|  | **BSA** | **BMI** | **Age** |
| --- | --- | --- | --- |
| **AP Resting Pre** | 0.004 | 0.204 | 0.044 |
| **LL Resting Pre** | -0.021 | 0.192 | 0.065 |
| **Aspect Resting Pre** | 0.138 | 0.115 | -0.013 |
| **CSA Resting Pre** | 0.010 | 0.214 | 0.054 |
| **AP Inspirium Pre** | 0.110 | -0.045 | -0.090 |
| **LL Inspirium Pre** | 0.053 | -0.018 | -0.096 |
| **Aspect Inspirium Pre** | 0.085 | -0.202 | -0.097 |
| **CSA Inspirium Pre** | 0.074 | -0.058 | -0.103 |
| **AP Valsalva Pre** | -0.005 | 0.250 | 0.122 |
| **LL Valsalva Pre** | 0.013 | 0.261 | 0.132 |
| **Aspect Valsalva Pre** | 0.028 | -0.162 | -0.116 |
| **CSA Valsalva Pre** | 0.002 | 0.244 | 0.144 |
| **Cava Resting Pre** | 0.105 | 0.219 | 0.028 |
| **Cava Inspirium Pre** | 0.082 | 0.191 | -0.036 |
| **CCI Pre** | 0.068 | -0.090 | -0.074 |
| **JCI Pre** | -0.071 | 0.242 | 0.077 |
| **JVD Ratio Pre** | -0.089 | -0.124 | 0.083 |
| **CSA Ratio Pre** | -0.155 | -0.136 | 0.062 |
| **AP Resting Post** | 0.072 | 0.188 | -0.056 |
| **LL Resting Post** | 0.091 | 0.357* | -0.005 |
| **Aspect Resting Post** | 0.016 | -0.095 | -0.092 |
| **CSA Resting Post** | 0.117 | 0.279 | 0 |
| **AP Inspirium Post** | 0.088 | -0.094 | -0.125 |
| **LL Inspirium Post** | 0.094 | -0.056 | -0.094 |
| **Aspect Inspirium Post** | 0.148 | -0.131 | -0.192 |
| **CSA Inspirium Post** | 0.073 | -0.094 | -0.109 |
| **AP Valsalva Post** | 0.145 | 0.349* | 0.095 |
| **LL Valsalva Post** | -0.156 | 0.096 | 0.068 |
| **Aspect Valsalva Post** | 0.351* | 0.147 | -0.045 |
| **CSA Valsalva Post** | 0.008 | 0.257 | 0.069 |
| **Cava Resting Post** | 0.223 | 0.153 | 0.084 |
| **Cava Inspirium Post** | 0.396** | 0.236 | 0.076 |
| **CCI Post** | -0.490*** | -0.283 | 0.081 |
| **JCI Post** | -0.048 | 0.207 | 0.177 |
| **JVD Ratio Post** | -0.082 | -0.099 | 0.046 |
| **CSA Ratio Post** | -0.159 | -0.152 | 0.030 |

Correlation coefficient for BSA, BMI and Age. *p<0.05; **p<0.01; ***p<0.001
